# Supplementary material
Source: Research Square preprint supplement (doi:10.21203/rs.3.rs-9715763/v1)

mBMMs

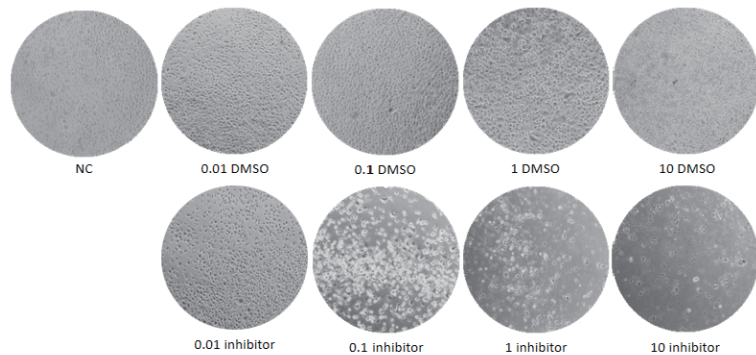

mBMMs

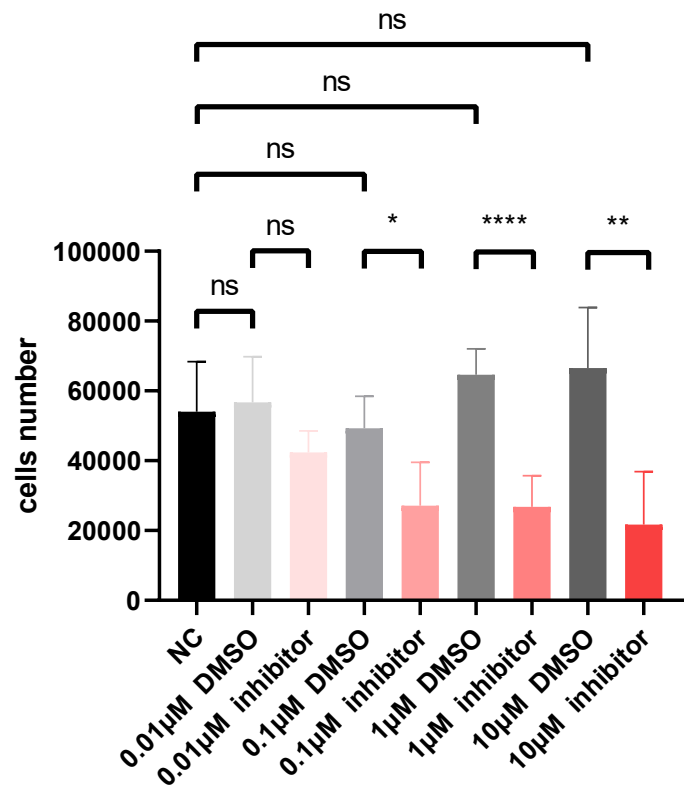

Supplement: Supplementary file 1 [file 3637c3b2fba21274cbce919c.pdf]
